# Supplementary material for: Avoiding pits on the energy landscape – alternative strategies for stabilizing nateglinide co-amorphous systems
Source: Royal Society of Chemistry journal article supplement (doi:10.1039/d4ce00195h), 2024-01-01
Supplement: d4ce00195h1.pdf [file d4ce00195h1.pdf]

# Avoiding pits on the energy landscape – alternative strategies for stabilizing nateglinide co- amorphous systems

Joana F. C. Silva,<sup>a</sup> Małgorzata Jasiurkowska-Delaporte,<sup>b</sup> Pedro S. Pereira Silva,<sup>c</sup> Manuela Ramos Silva,<sup>c</sup>  
M. Ermelinda S. Eusébio,<sup>a</sup> Mário T. S. Rosado<sup>\*a</sup>

<sup>a</sup> CQC-IMS, Departamento de Química, Faculdade de Ciências e Tecnologia,  
Universidade de Coimbra, 3004-535 Coimbra, Portugal

<sup>b</sup> Institute of Nuclear Physics, Polish Academy of Sciences,  
Radzikowskiego 152, PL-31342 Kraków, Poland

<sup>c</sup> CFisUC, Departamento de Física, Faculdade de Ciências e Tecnologia,  
Universidade de Coimbra, 3000-370 Coimbra, Portugal

## Supplementary Material

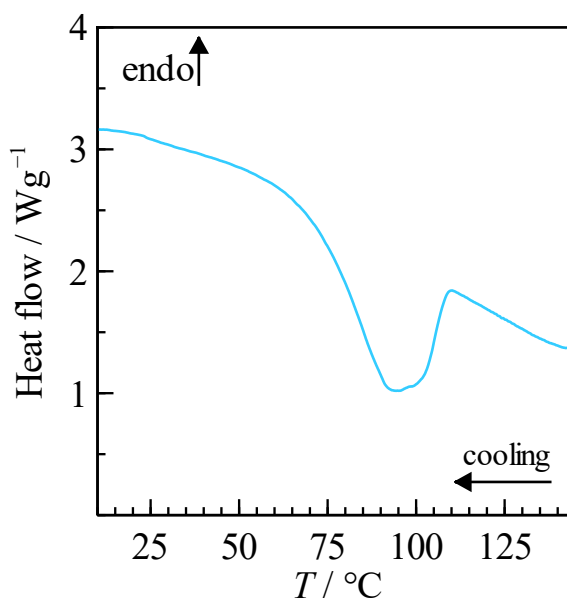

**Fig. S1.** DSC thermogram of molten **NTG** sample, showing crystallization in cooling run.  $|\beta| = 10 \text{ }^{\circ}\text{C min}^{-1}$ .

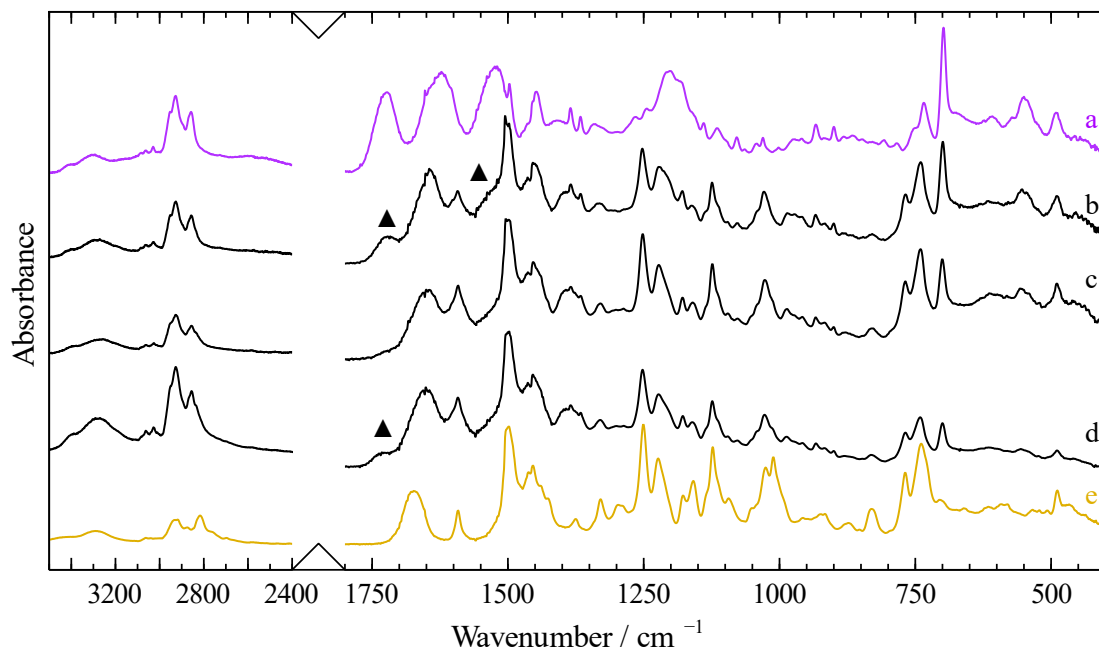

**Fig. S2.** FTIR-ATR spectra of a) cryo-milled sample of **NTG**, b) cryo-milled sample of **NTG-RNL 2:1**, c) cryo-milled sample of **NTG-RNL 1:1**, d) quench-cooled sample of **NTG-RNL 1:1** and e) cryo-milled sample of **RNL**.
